# Supplementary material for: Extracellular Vesicle Encapsulated MicroRNAs in Patients with Type 2 Diabetes Are Affected by Metformin Treatment
Source: MDPI journal article supplement (doi:10.3390/jcm8050617), 2019-05-07
Supplement: s1 [file s1]

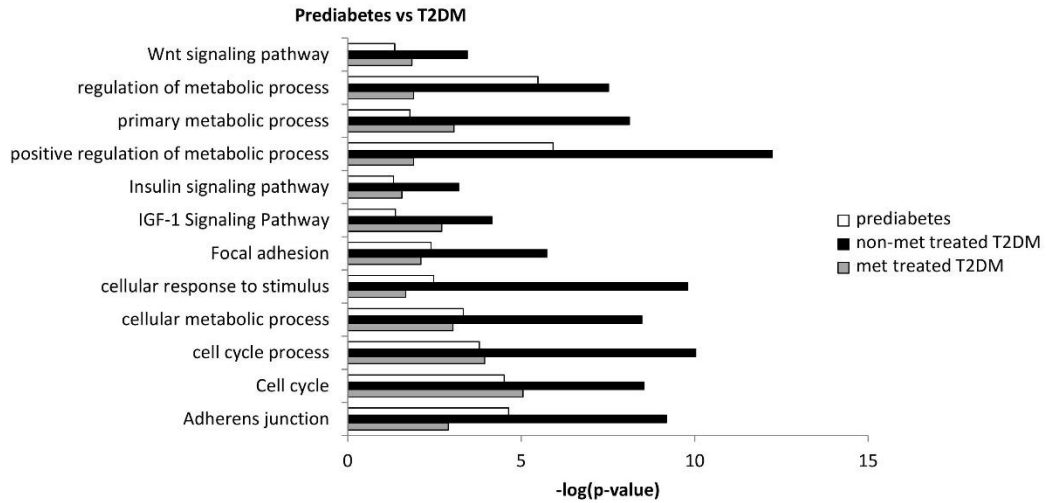

Figure S1: Fold enrichment of biological terms/pathways compared between METSIM and MetaHIT plasma miRNAs.

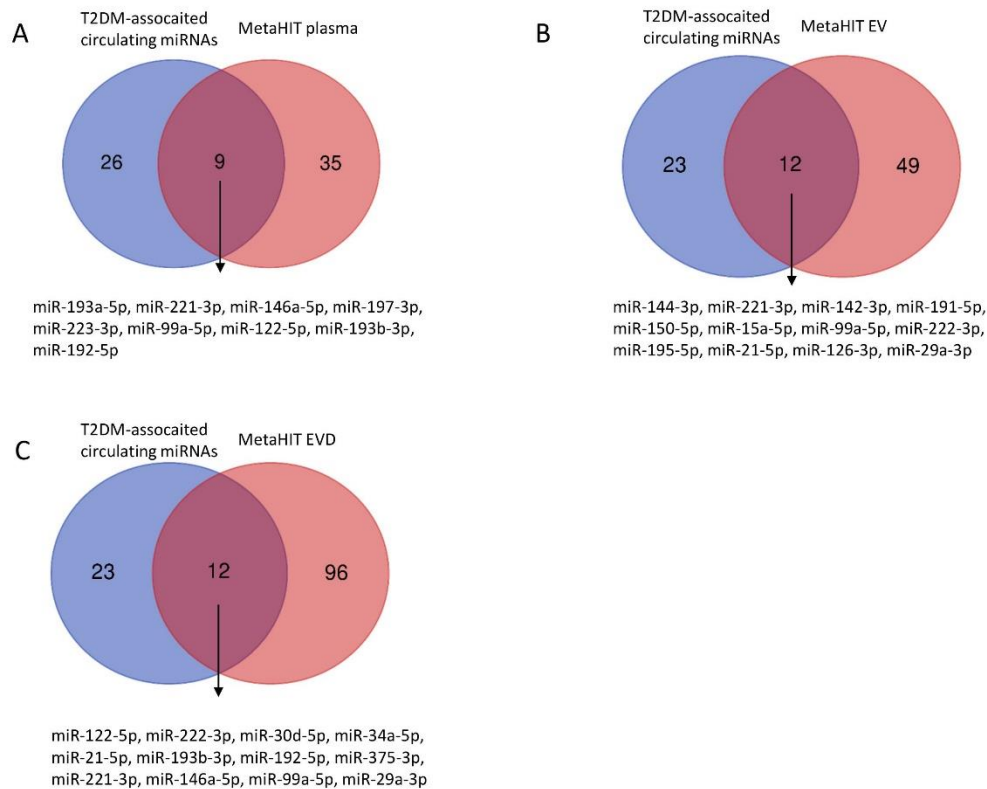

Figure S2: Overlap between circulating miRNAs associated with T2DM and circulating miRNAs identified from MetaHIT samples.
